# Supplementary material for: Supramolecular polymeric prodrug micelles for efficient anticancer drug delivery
Source: Royal Society of Chemistry journal article supplement (doi:10.1039/d2py00332e), 2022-01-01
Supplement: d2py00332e1.pdf [file d2py00332e1.pdf]

*Supporting Information for*

**Supramolecular Polymeric Prodrug Micelles for Efficient Anticancer  
Drug Delivery**

**Ying Wang,<sup>a, b</sup> Peng Chen,<sup>a</sup> Qiaojie Luo,<sup>\*c</sup> Xiaodong Li<sup>c</sup> and Weipu Zhu<sup>\*a, d</sup>**

<sup>a</sup> MOE Key Laboratory of Macromolecular Synthesis and Functionalization, Department of Polymer Science and Engineering, Zhejiang University, Hangzhou 310027, China.

<sup>b</sup> National Engineering Laboratory for Textile Fiber Materials and Processing Technology (Zhejiang), Zhejiang Sci-Tech University, Hangzhou 310018, China.

<sup>c</sup> Department of Oral and Maxillofacial Surgery, Affiliated Stomatology Hospital, School of Medicine, Zhejiang University, Hangzhou 310006, China.

<sup>d</sup> Key Laboratory of Adsorption and Separation Materials & Technologies of Zhejiang Province, Zhejiang University, Hangzhou 310027, China

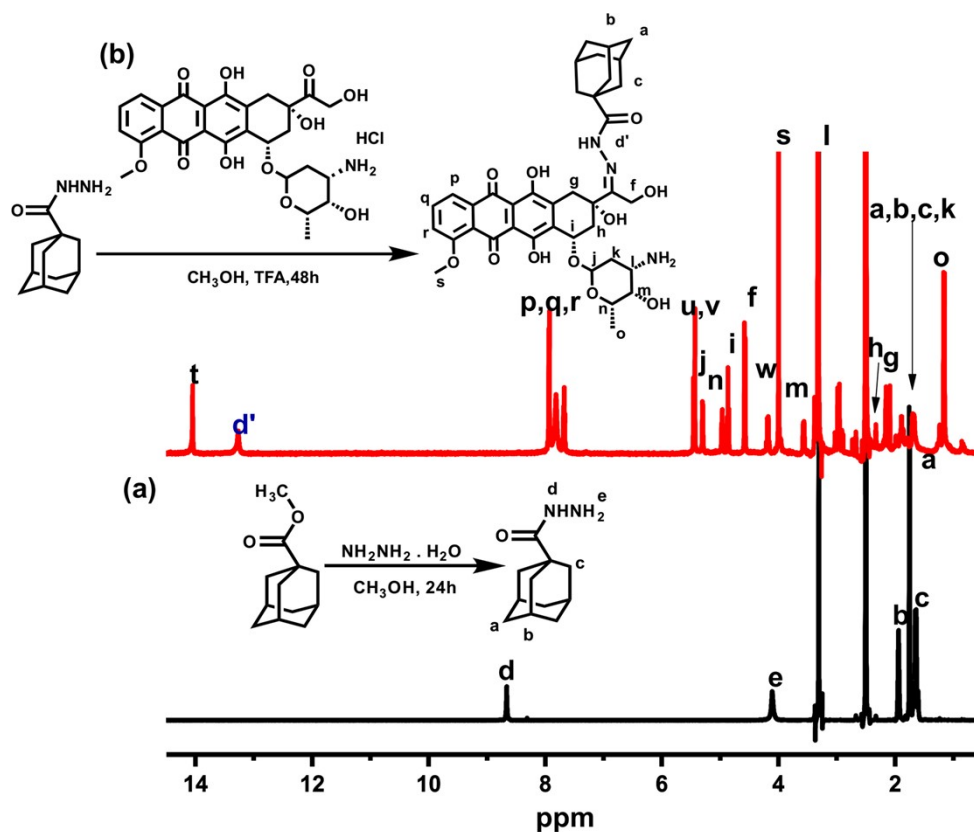

**Fig. S1** Syntheses and <sup>1</sup>H NMR spectra of AD-NHNH<sub>2</sub> (a) and AD-DOX (b) in DMSO-*d*<sub>6</sub>.

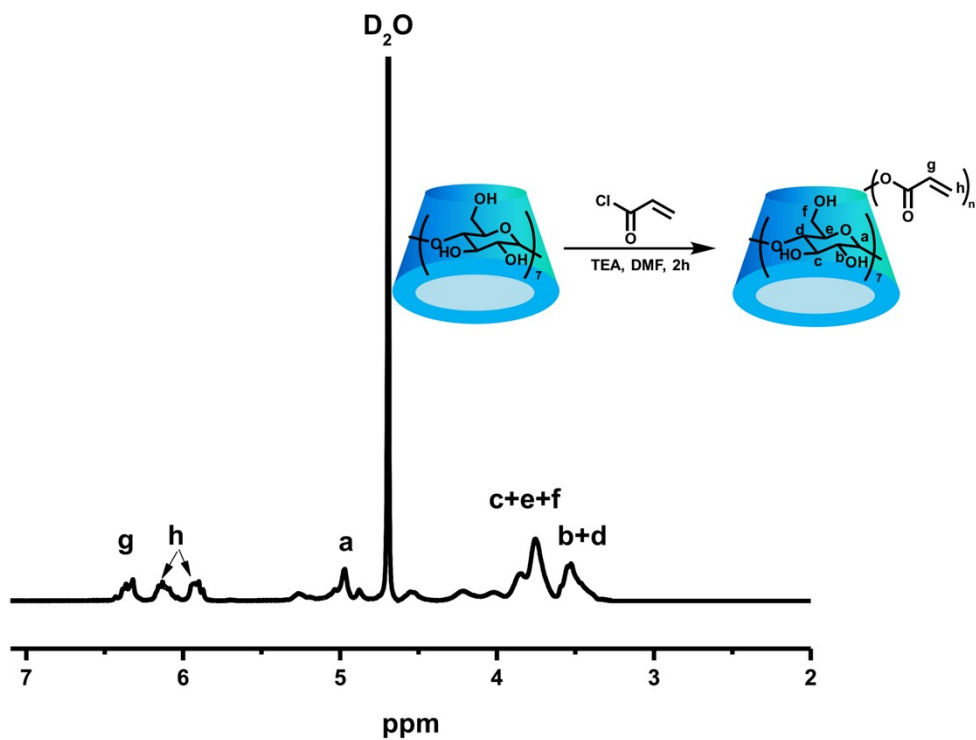

**Fig. S2**  $^1\text{H}$  NMR spectrum of CD-acryl.

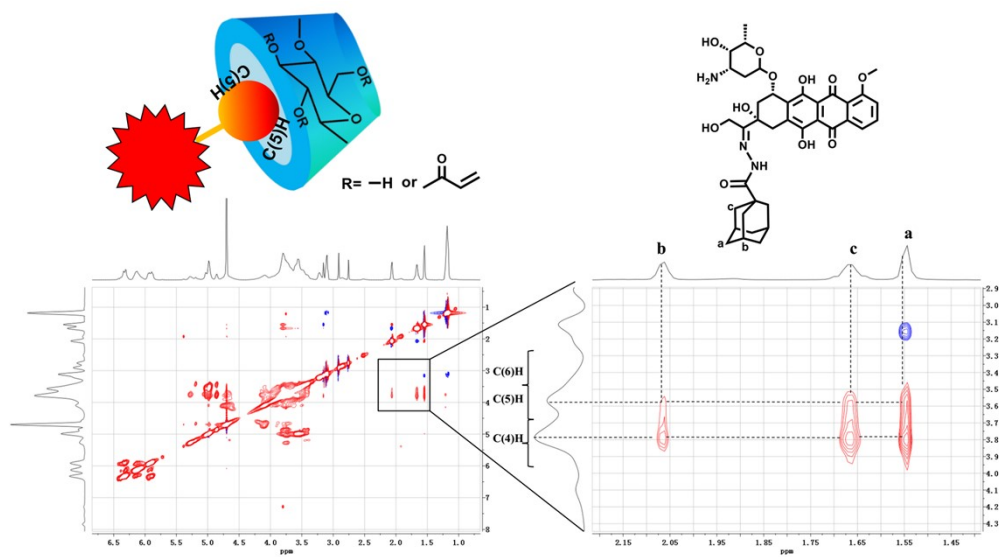

**Fig S3.**  $^1\text{H}$ - $^1\text{H}$  NOESY spectrum of a 1:1 mixture of AD-DOX and CD-acryl in  $\text{D}_2\text{O}$

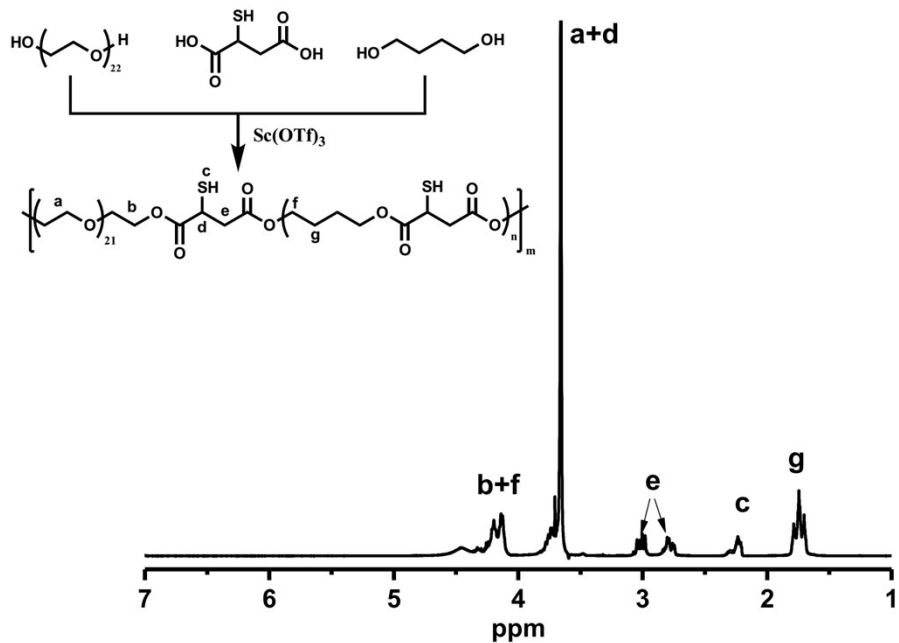

**Fig. S4** Synthesis and <sup>1</sup>H NMR spectrum of POEGBMS in CDCl<sub>3</sub>.

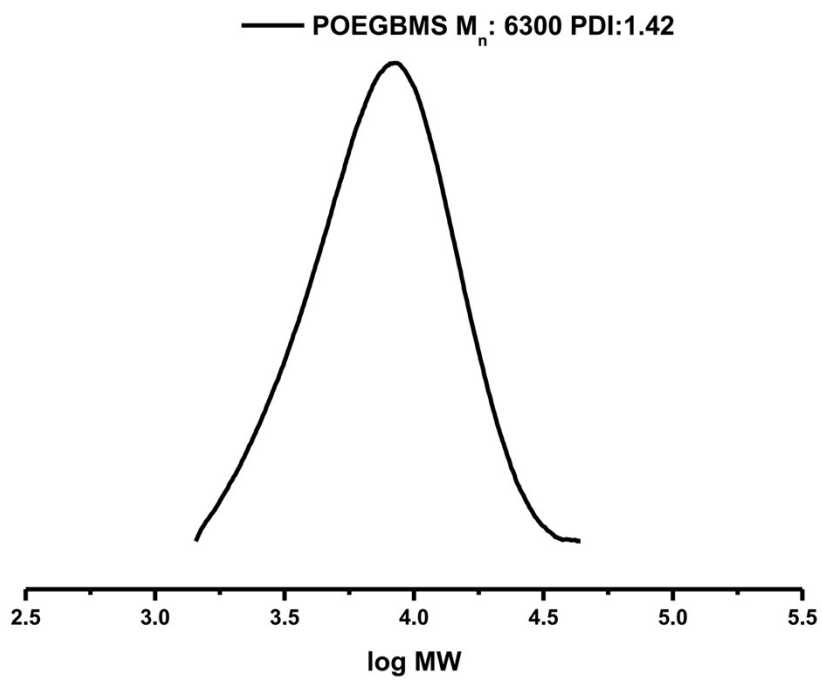

**Fig. S5** GPC curve of POEGBMS.

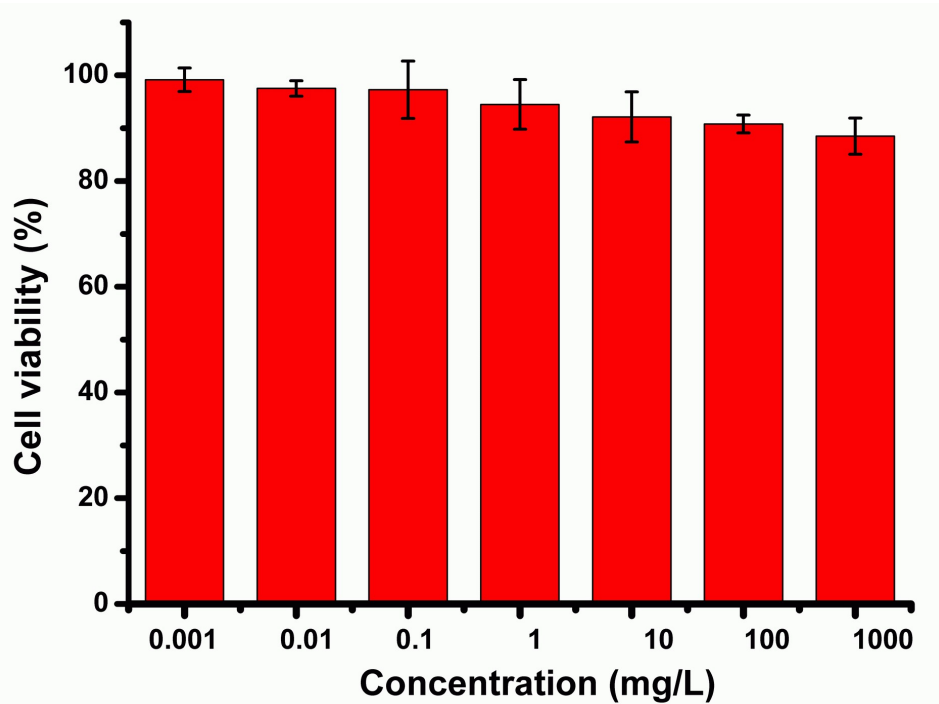

**Fig. S6** Cytotoxicity studies of blank POEGBMS/CD-acryl micelles after incubation with HeLa cells for 48 h.
